# Supplementary material
Source: PubMed Central journal article supplement (PMC9973298)

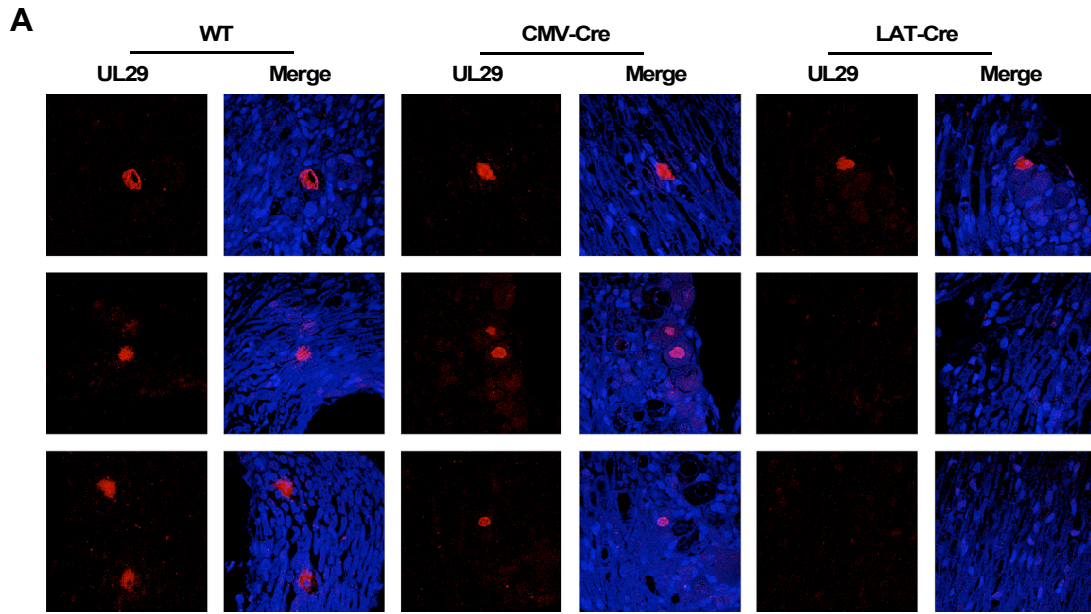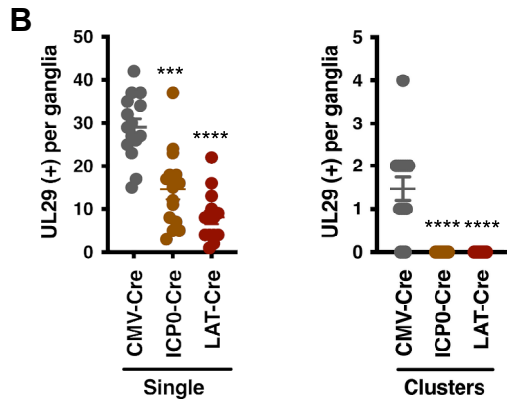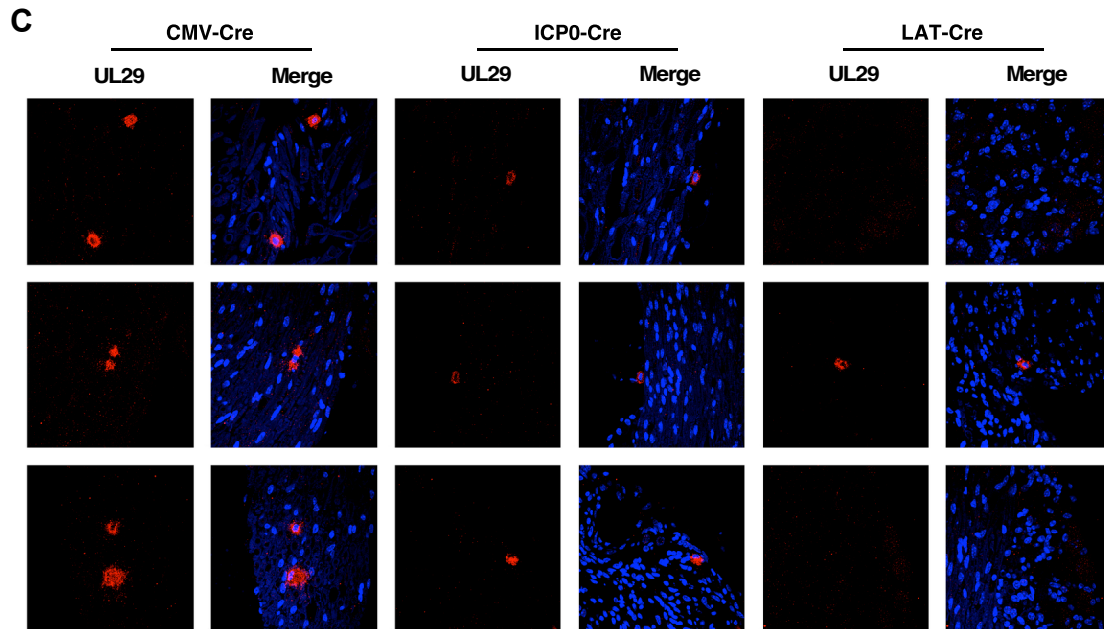

Supplement: mbio.03542-22-s0003.pdf [file mbio.03542-22-s0003.pdf]

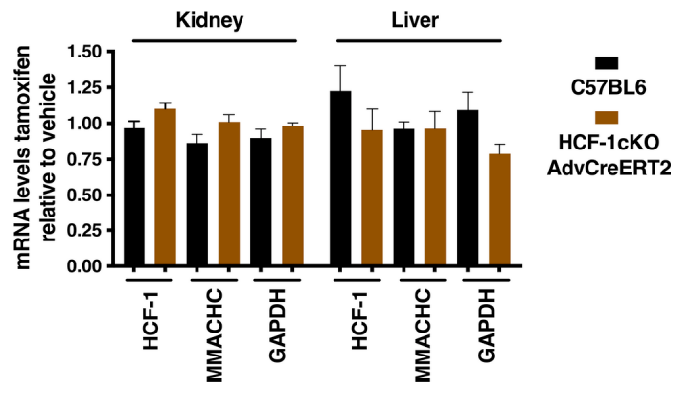

Supplement: mbio.03542-22-s0005.pdf [file mbio.03542-22-s0005.pdf]

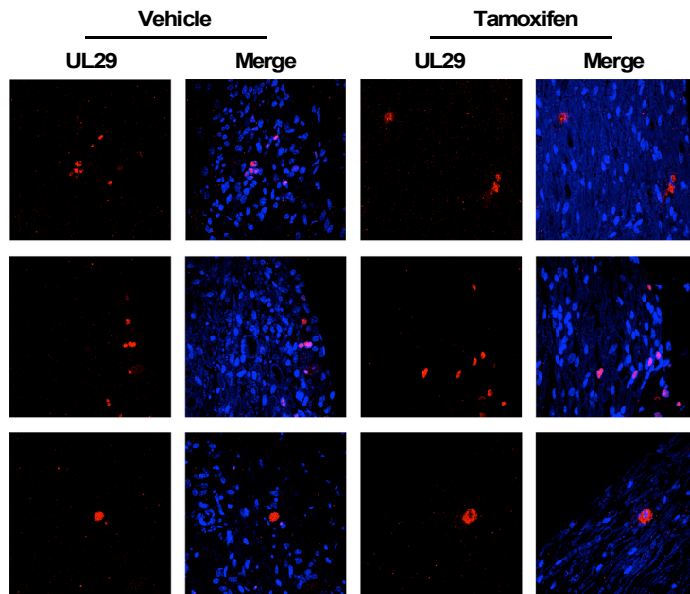

Supplement: mbio.03542-22-s0006.pdf [file mbio.03542-22-s0006.pdf]
